# Supplementary material
Source: bioRxiv or medRxiv preprint supplement (https://www.biorxiv.org/highwire/filestream/26068/field_highwire_adjunct_files/0/092163-1.pdf)
Supplement: Supplementary file [file 092163-1.pdf]

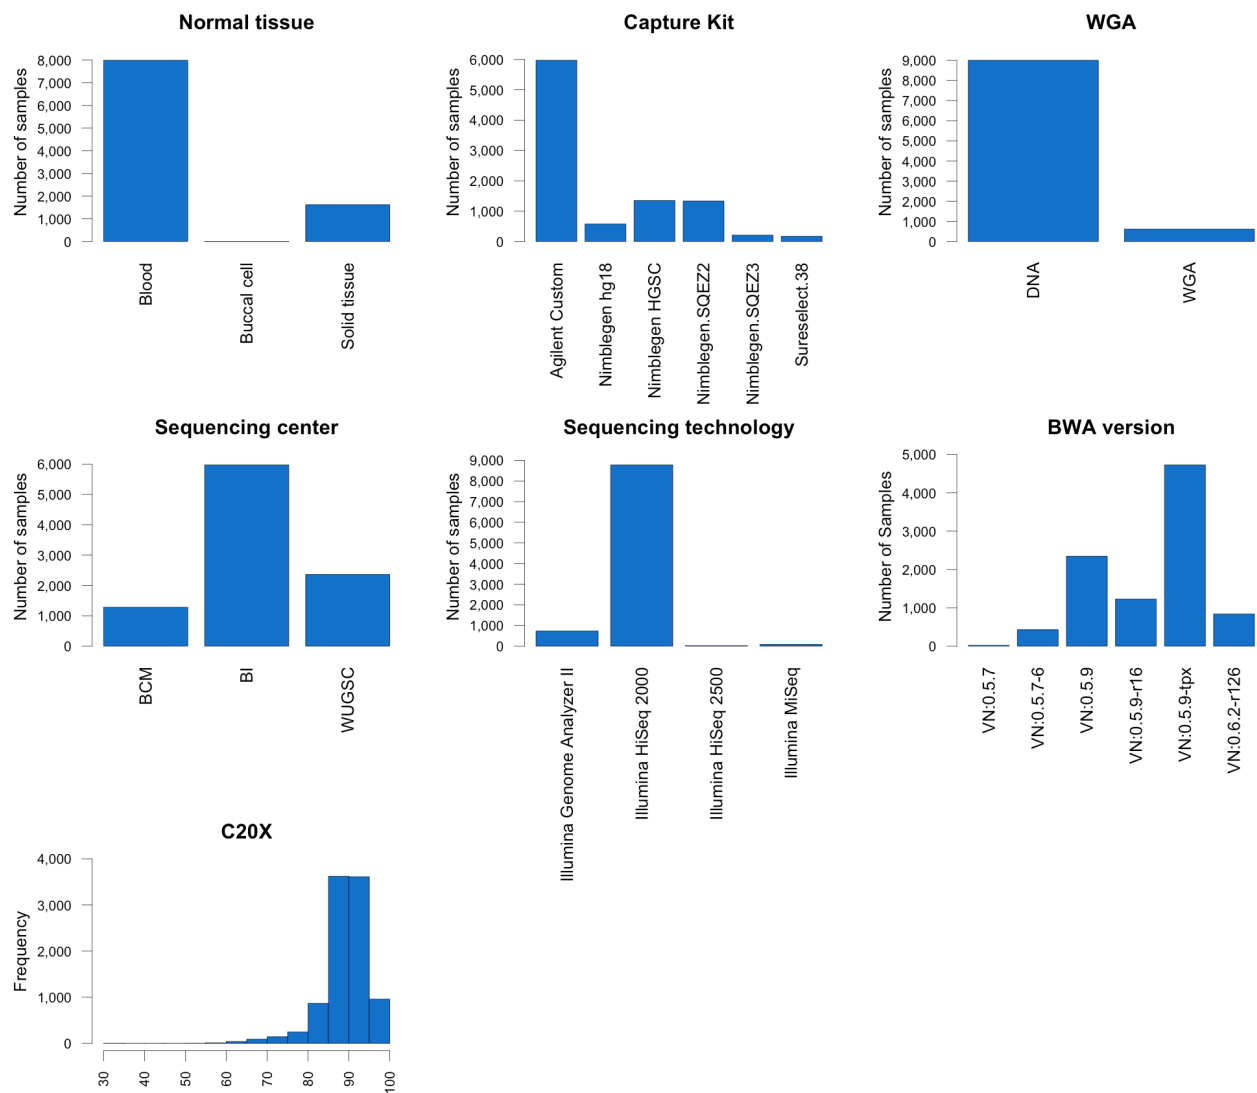

**S1 Fig. Distribution of technical covariates for the pan-cancer cohort.**

The distribution of the seven identified technical covariates for  $n=9618$  TCGA WXS samples. Capture efficiency is measured as percentage of capture target area covered by at least 20 X read depth (denoted C20X)

## Number of unique workflows by cancer type

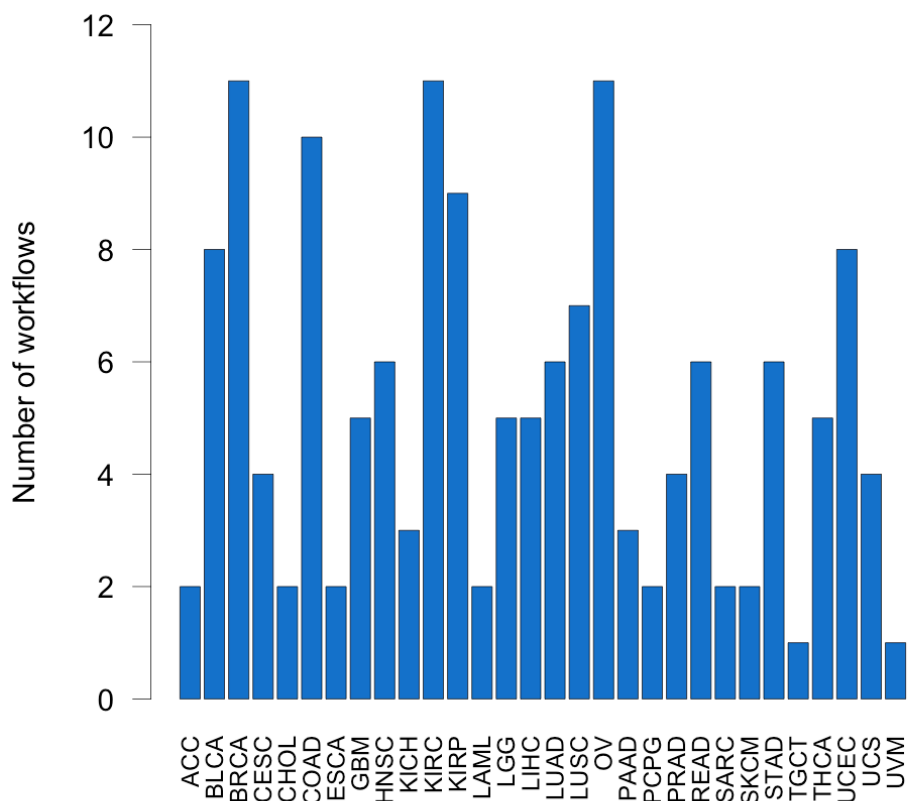

### S2 Fig. Number of processing workflows used to generate TCGA WXS data.

The number of unique combinations of six technical factors (sequencing center, normal tissue, WGA, BWA version, capture kit, and sequencing technology) per cancer type

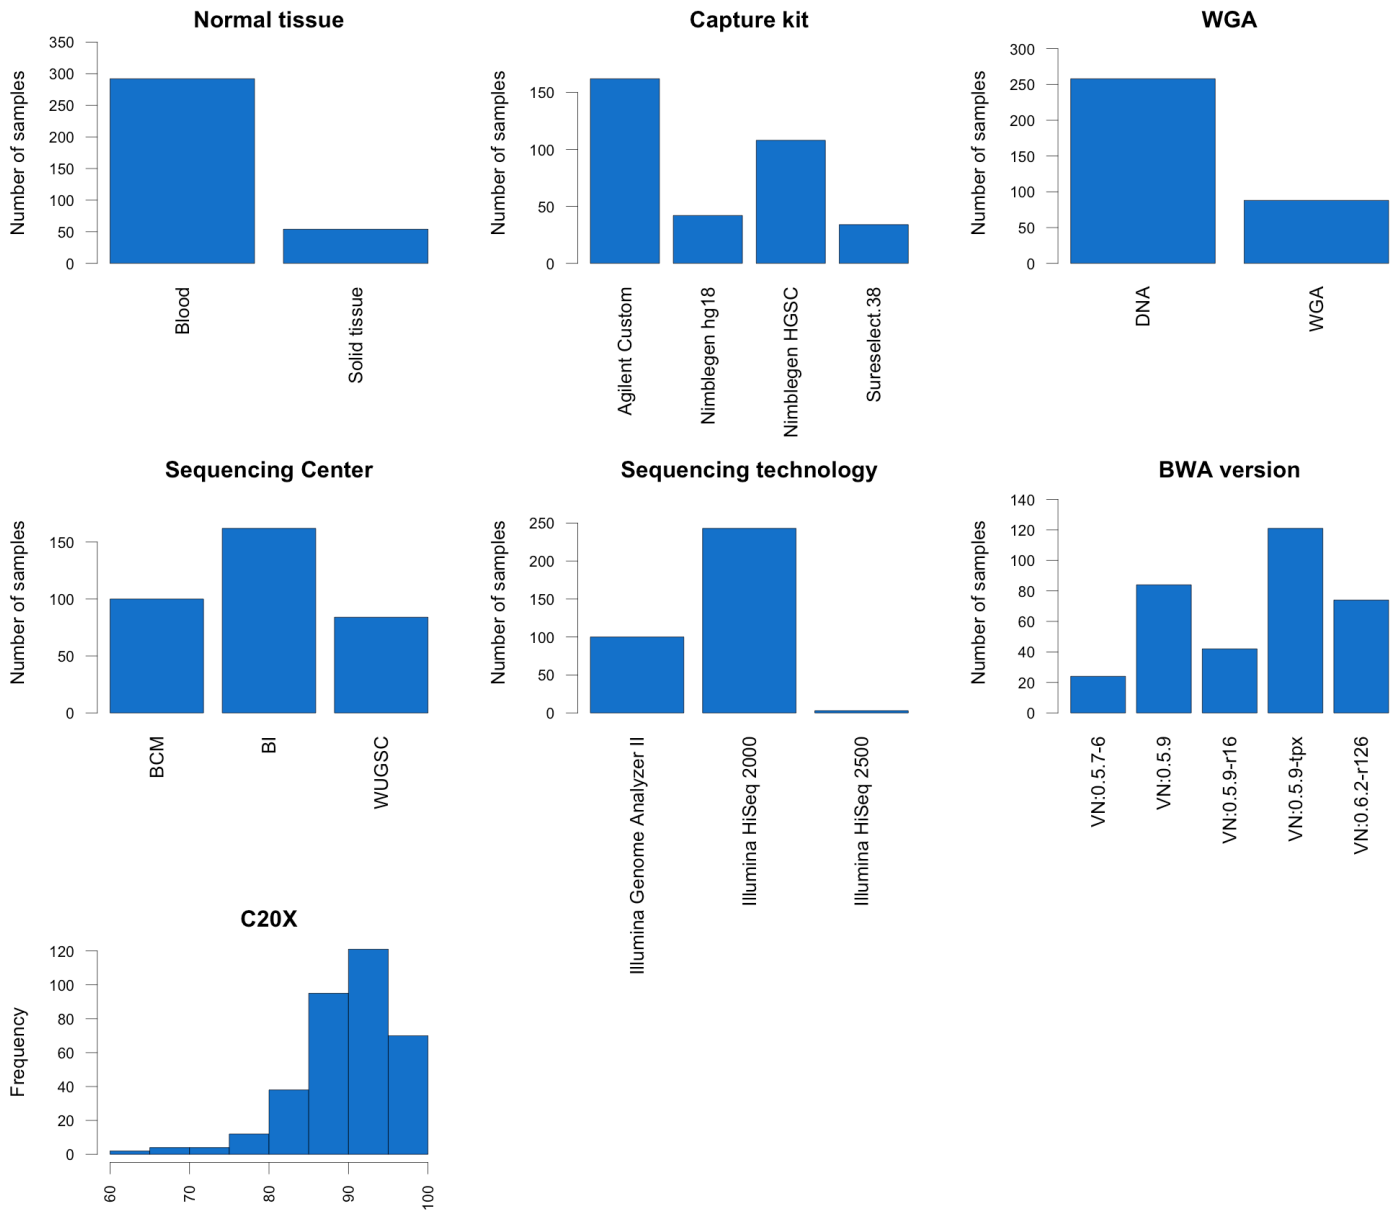

**S3 Fig. Distribution of technical covariates for the NewAlign cohort.**  
 The distribution of the seven identified technical covariates for  $n=345$  TCGA WXS samples.

### Discordance between alignment pipelines

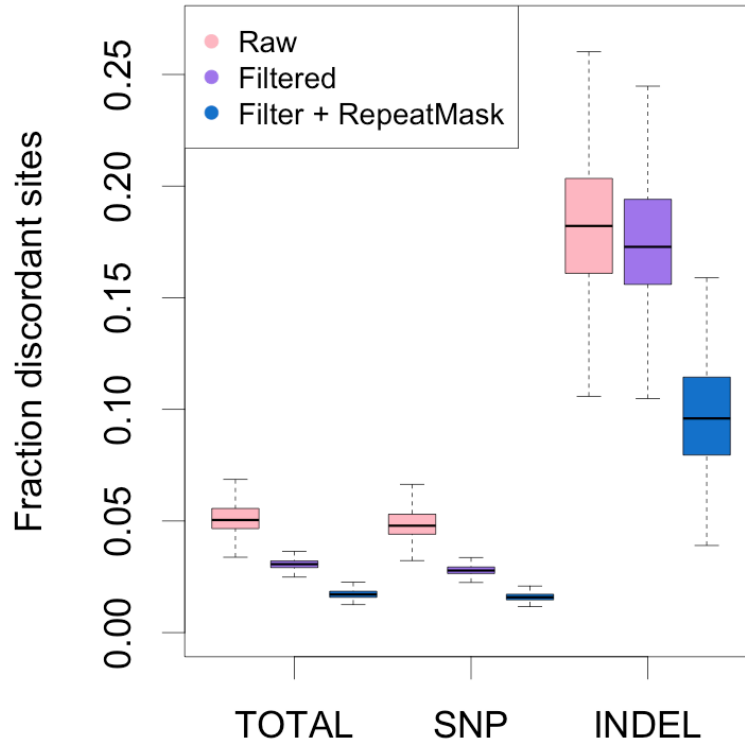

**S4 Fig. Variant call discordance between NewAlign and OldAlign samples (n=345).**

For filtered condition SNPs were filtered using GATK VQSR TS 99.5 and indels using GATK hardfilter. For filtered + RepeatMask condition variants in UCSC tracks RepeatMasker and Segmental Dups were excluded.

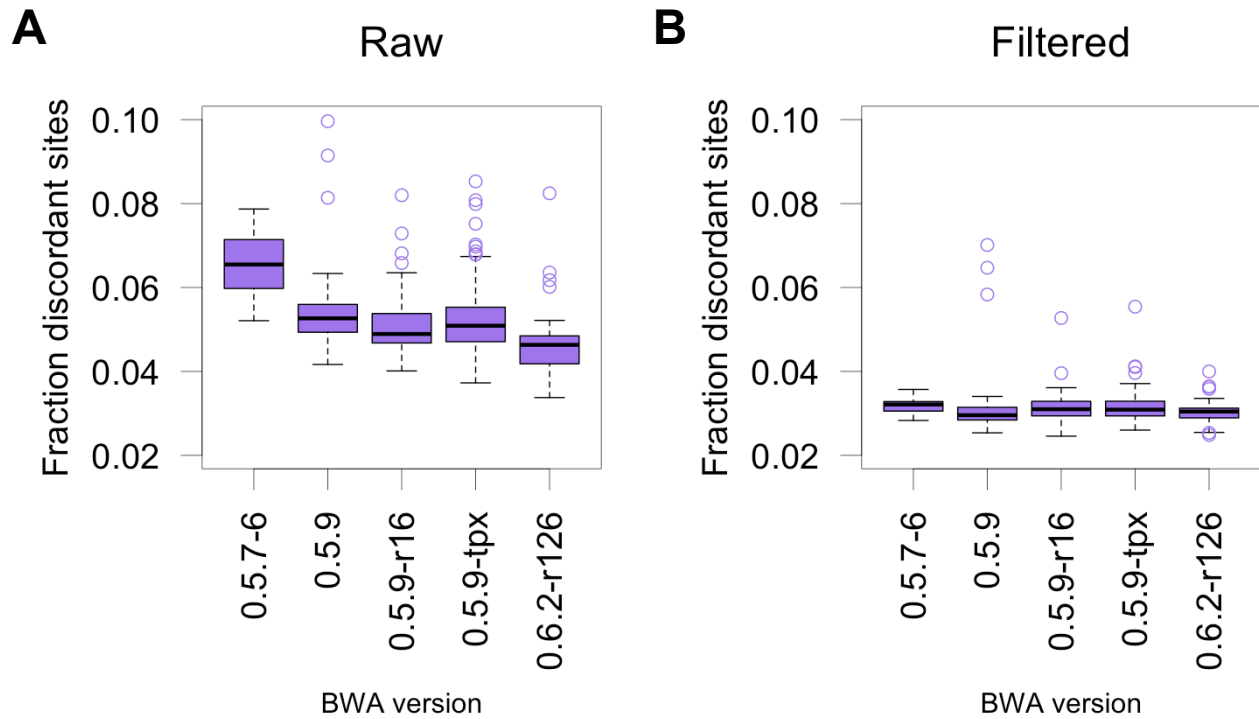

**S5 Fig. Discordance with BAM realignment plotted by BWA version used to generate BAM file.** (A) Raw VCF discordance between NewAlign and OldAlign samples plotted by BWA version. (B) Filtered VCF discordance between NewAlign and OldAlign samples plotted by BWA version. SNPs were filtered at GATK VQSR TS 99.5, indels with Hardfilters.

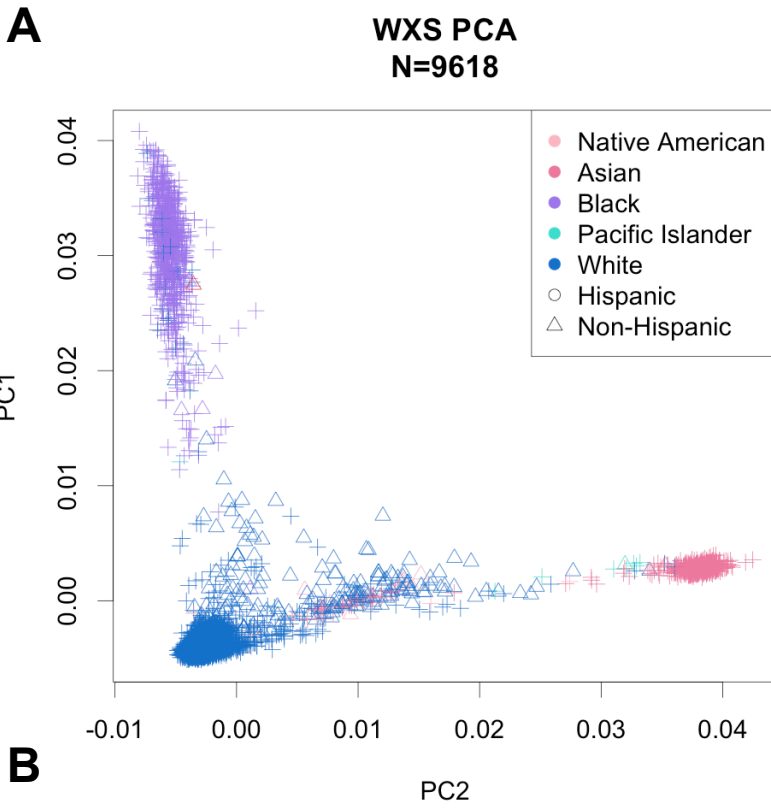

**S6 Fig. PCA of common variants from pan-cancer VCF.**

(A) Principal components 1 and 2 calculated from AF > 1% variants. Individuals colored by self report race. (B) Percent total variance explained by the top 10 principal components.

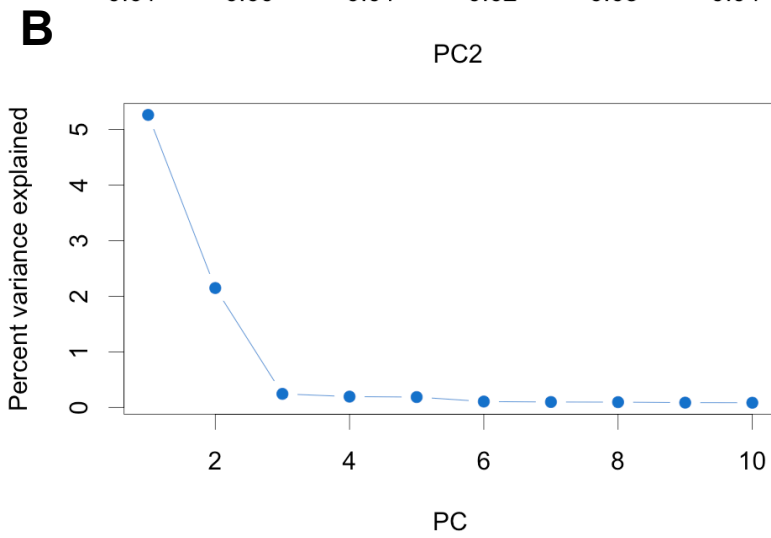

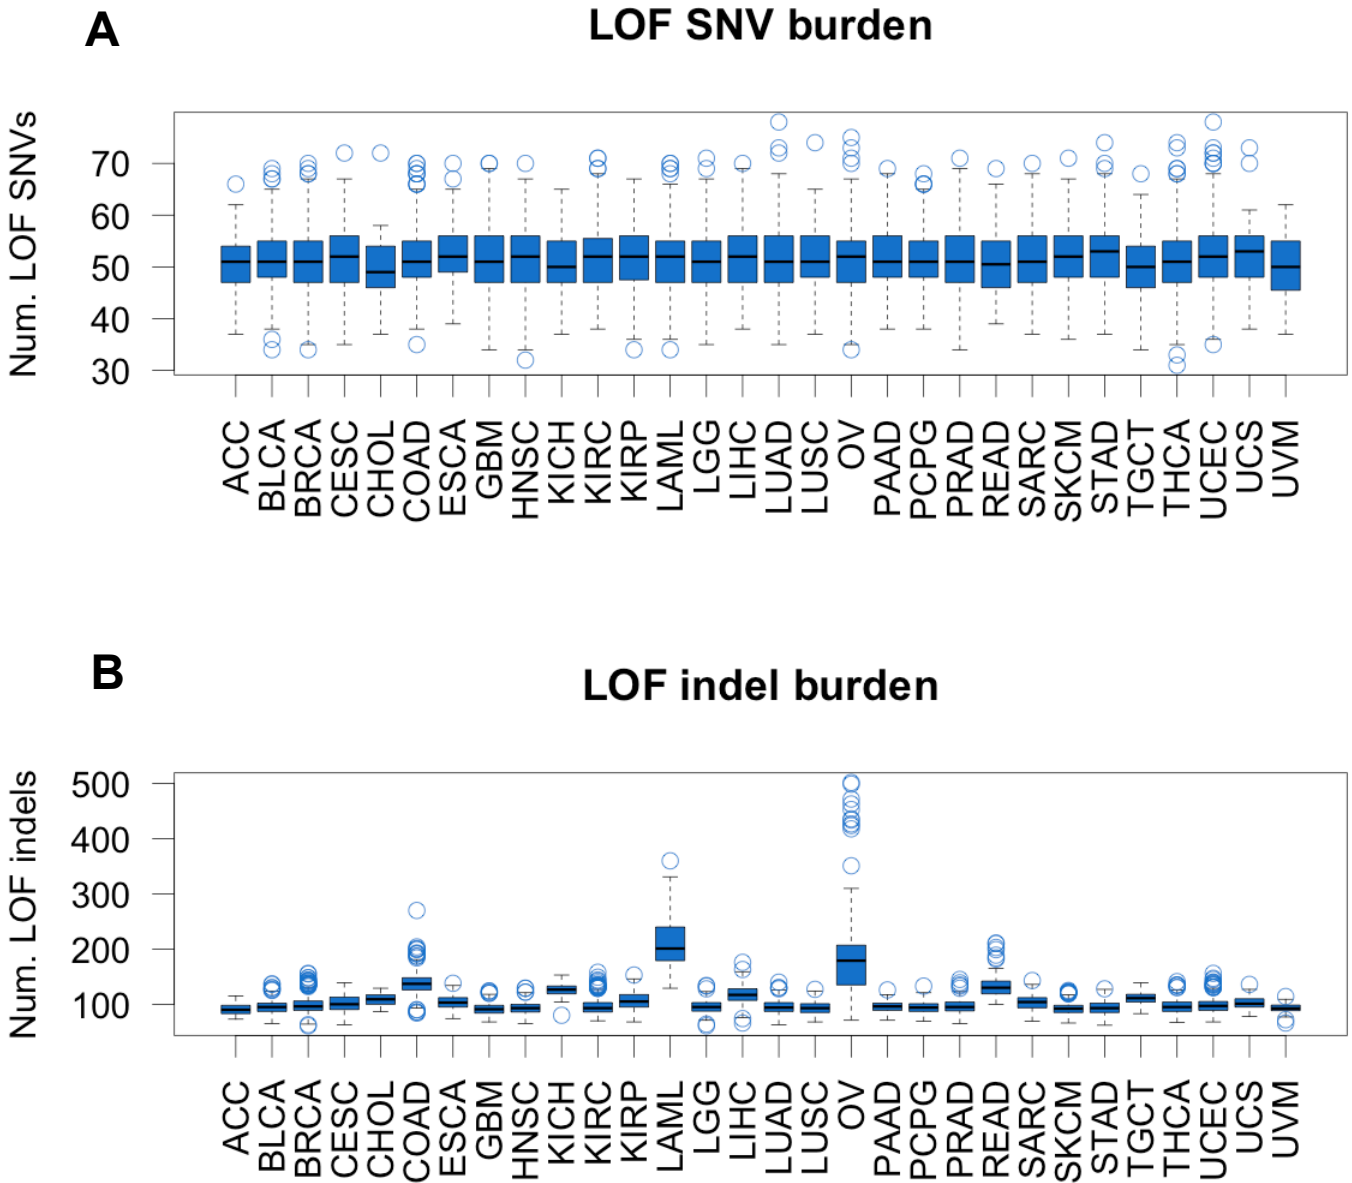

**S7 Fig. LOF variant burden split by variant type.**

(A) Individual LOF SNP burden plotted by cancer type. (B) Individual LOF indel burden plotted by cancer type

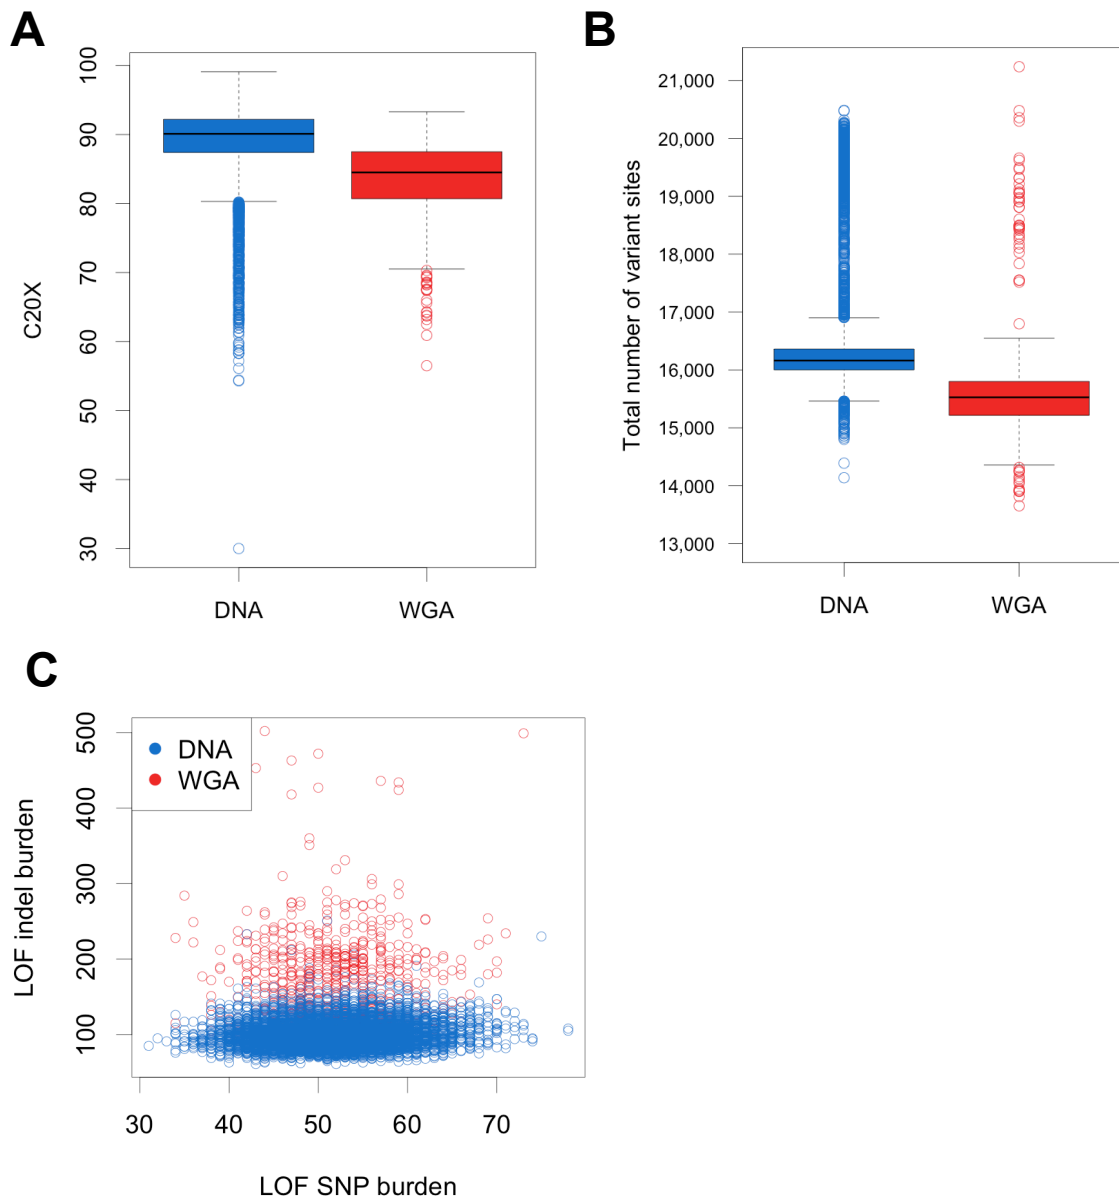

**S8 Fig. Capture efficiency and variant profile of WGA samples.**

(A) C20X plotted by WGA status. (B) Total number of variant calls plotted by WGA status. (C) Individual LOF indel burden vs. individual LOF SNP burden. Color indicates WGA status.



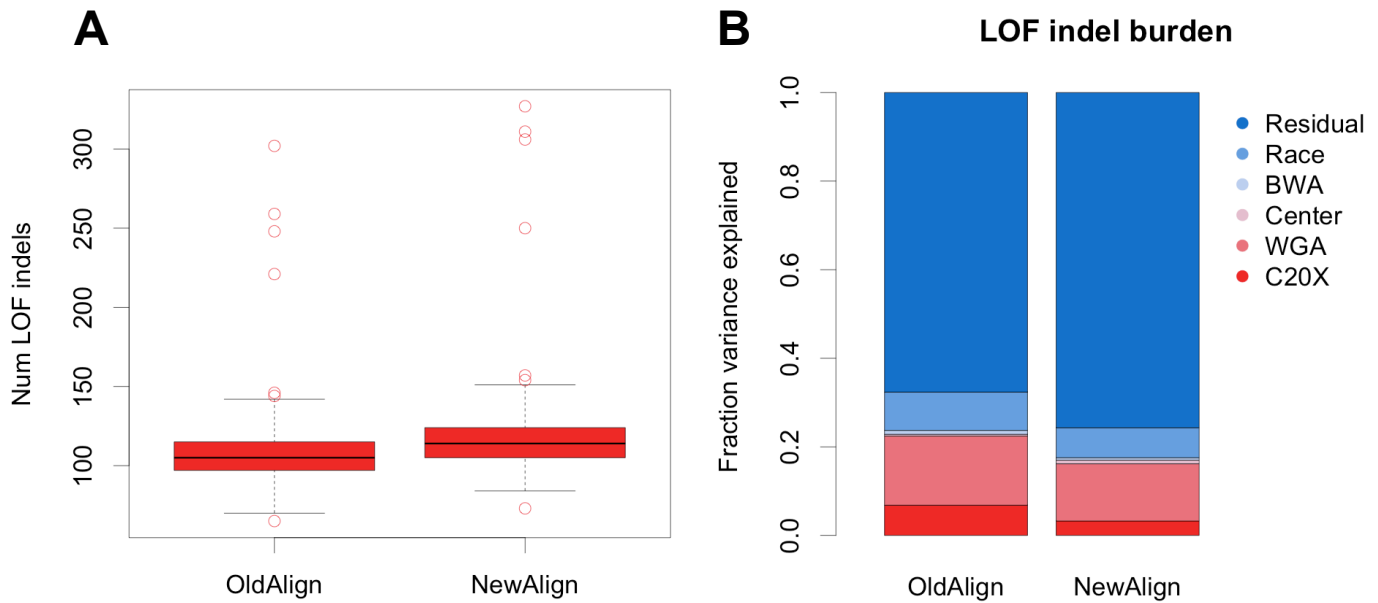

**S9 Fig. Variance in LOF indel burden explained by technical factors in NewAlign cohort.** (A) Number of LOF indels per individual in NewAlign and OldAlign pipelines. There were a median 8 more LOF indels in the NewAlign pipeline. Overall individual LOF indel burden was highly correlated between pipelines (Pearson  $R^2 = 0.947$ ). (B) Percent of variation in individual LOF indel burden explained by technical covariates as assessed by ANOVA.

# LOF indel burden by filter method

## VQSR 90

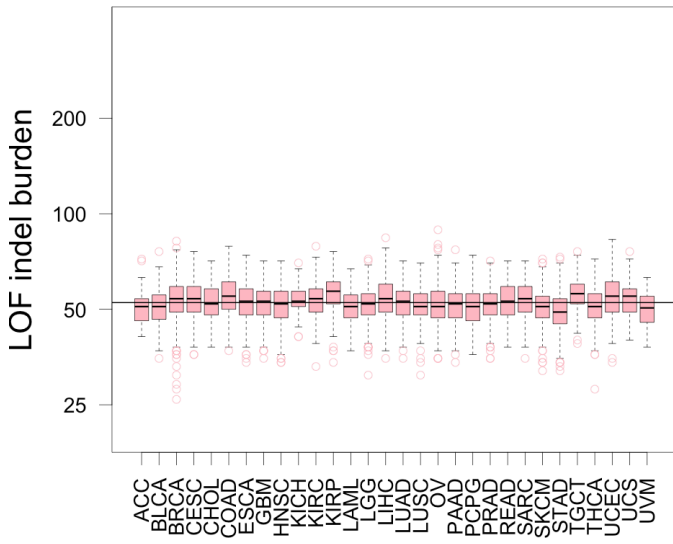

## VQSR 95

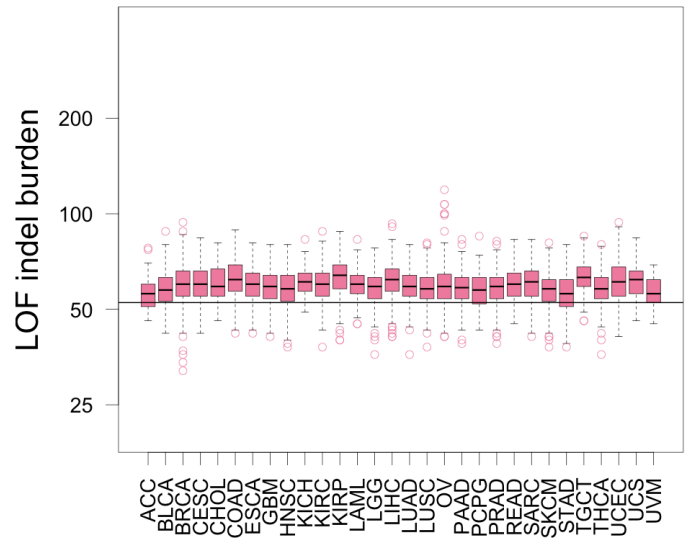

## Hardfilter

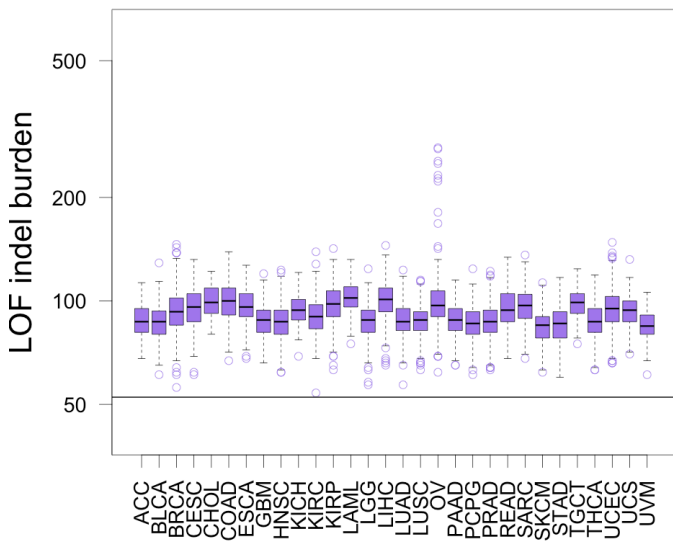

## VQSR 99

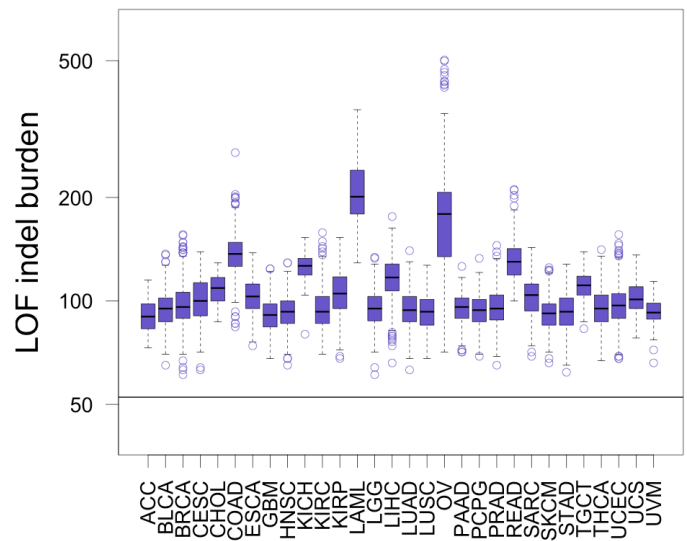

**S10 Fig. Individual LOF indel burden by cancer type for all indel filtering methods tested.** The black line represents the median LOF indel burden in the most stringent filter condition (VQSR 90) for comparison.

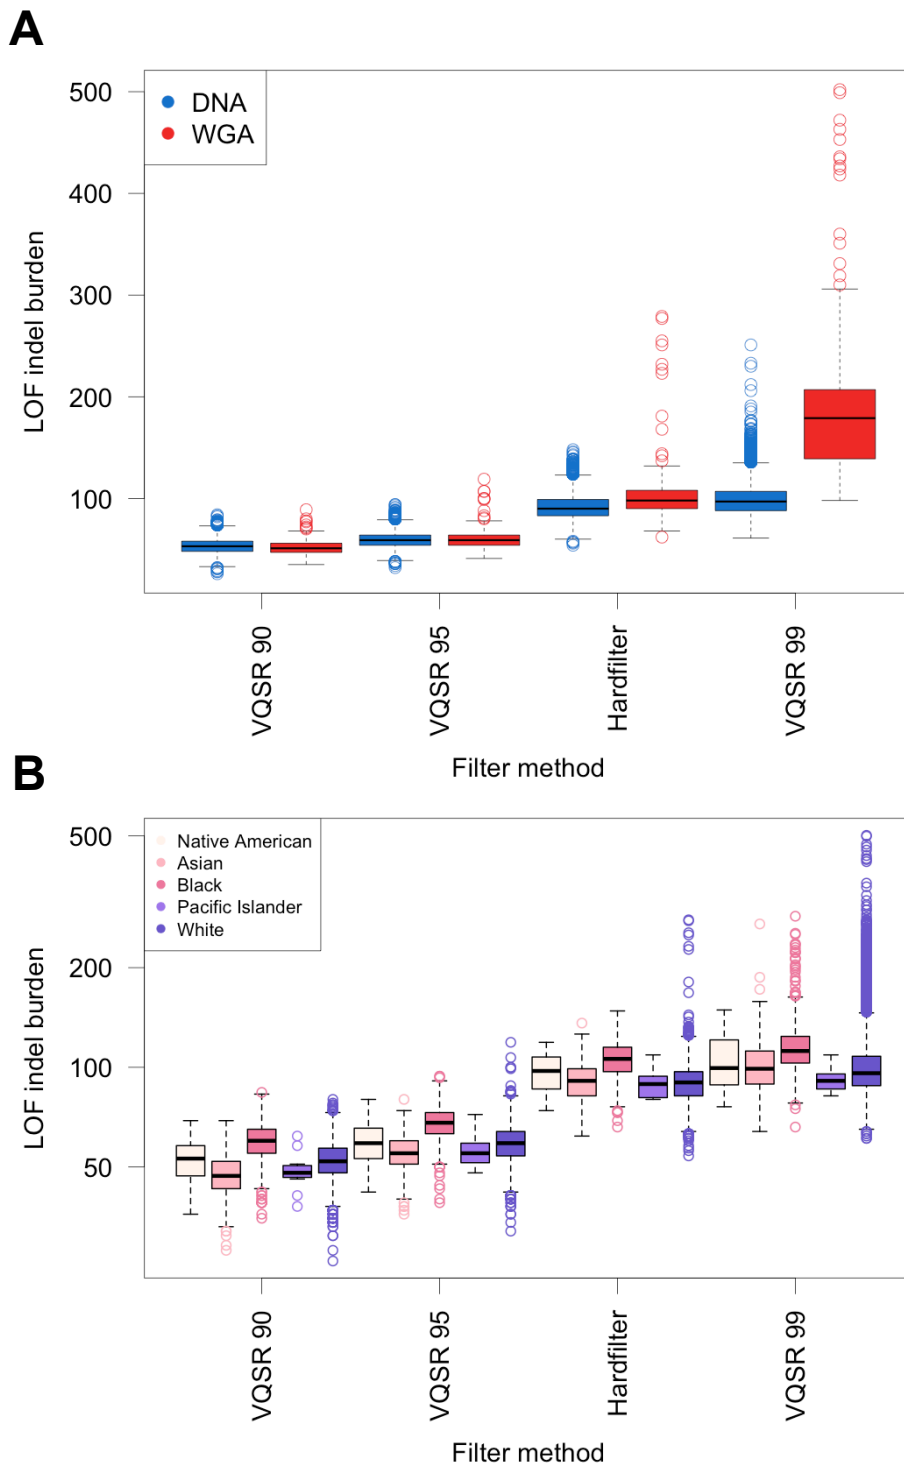

**S11 Fig. LOF indel burden plotted by WGA status and race.**

(A) Individual LOF indel burden by self-report race for each filter. (B) Individual LOF indel burden of WGA and DNA samples for each filter.

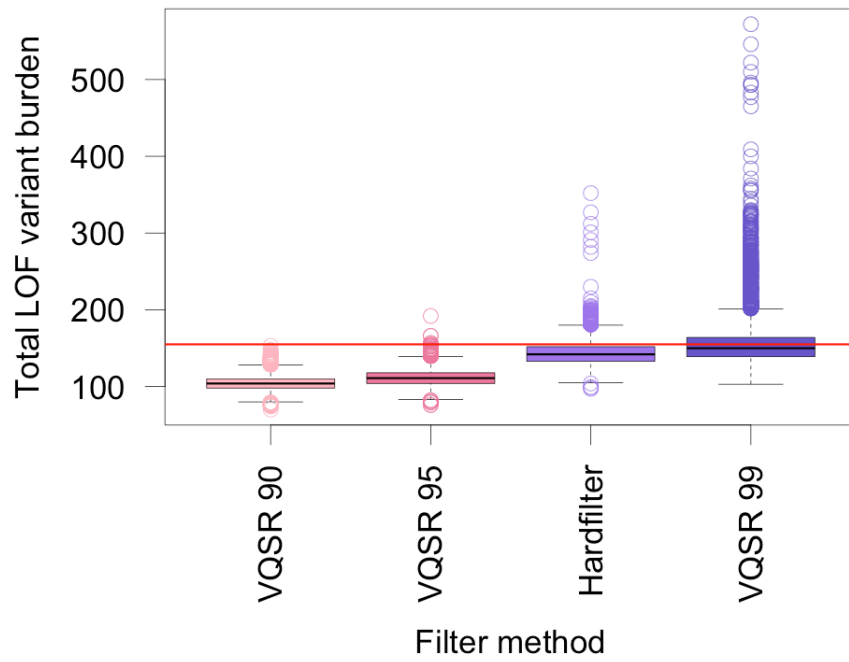

**S12 Fig. Total LOF variant count for tested indel filter methods.**  
LOF variant count includes both SNV and indels.

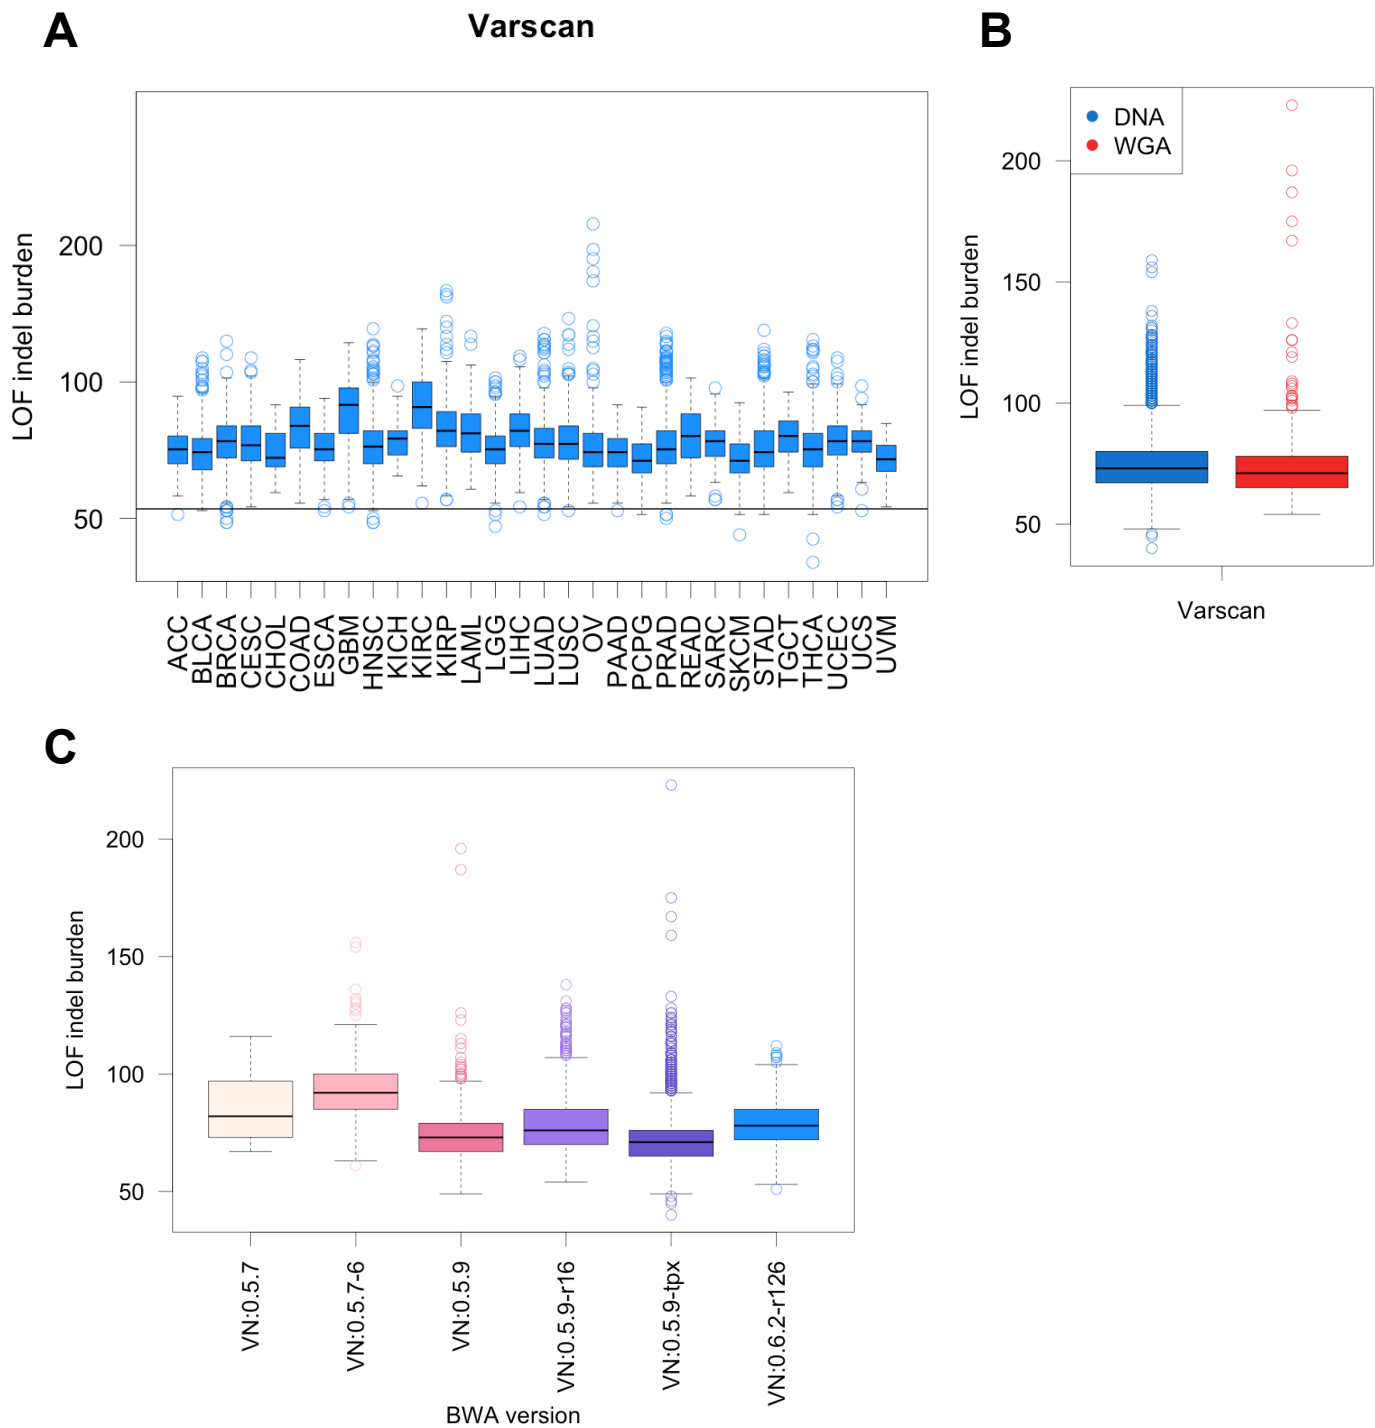

**S13 Fig. LOF indel burden from Varscan calls.**

(A) Individual varscan LOF indel burden by cancer type. The black line represents the median LOF indel burden in the most stringent filter condition (VQSR 90) for comparison. (B) Individual varscan LOF indel plotted by WGA status. (C) Individual varscan LOF indel plotted by BWA version used to generate BAM file.

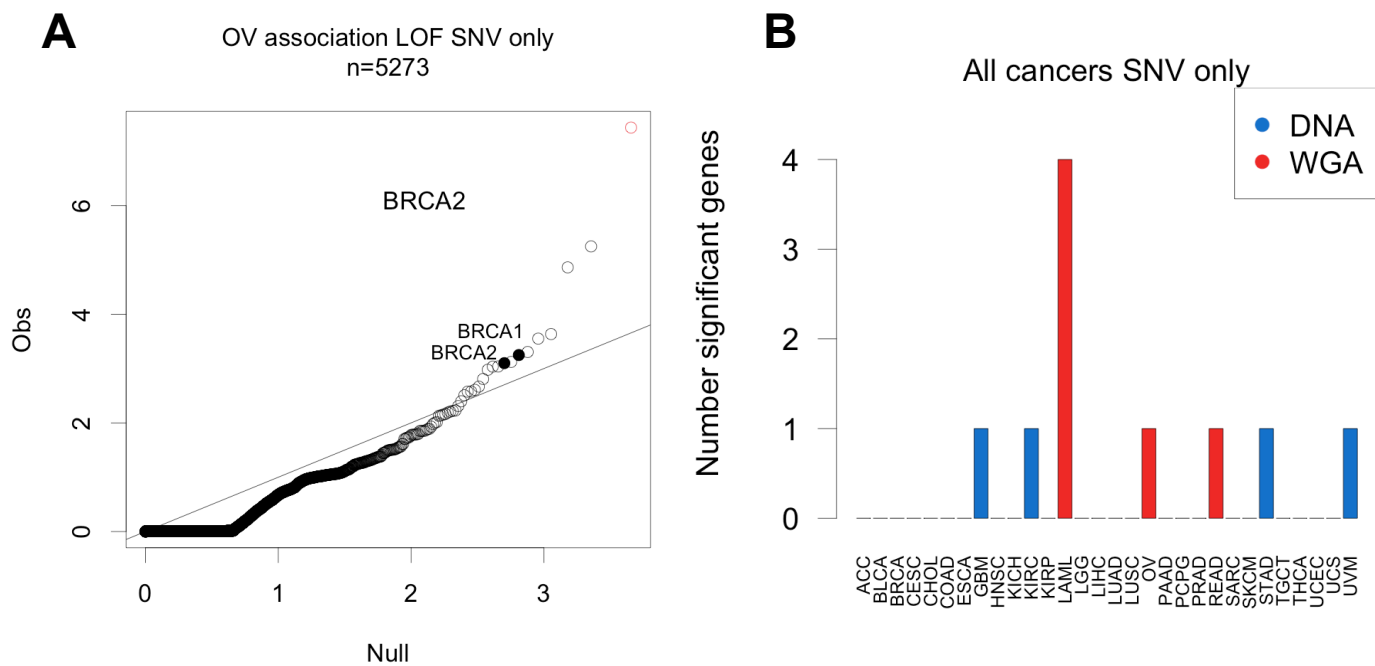

**S14 Fig. Logistic regression analysis using only LOF SNVs.**

(A) QQ plot from logistic regression association testing between germline LOF SNV burden and OV. N = number of genes tested. Red indicates associations significant  $p < 1.61 \times 10^{-7}$ . *BRCA1* association highlighted. (B) Number of genes significant  $p < 1.61 \times 10^{-7}$  by logistic regression for all cancer types. Color indicates cancer types containing WGA samples.

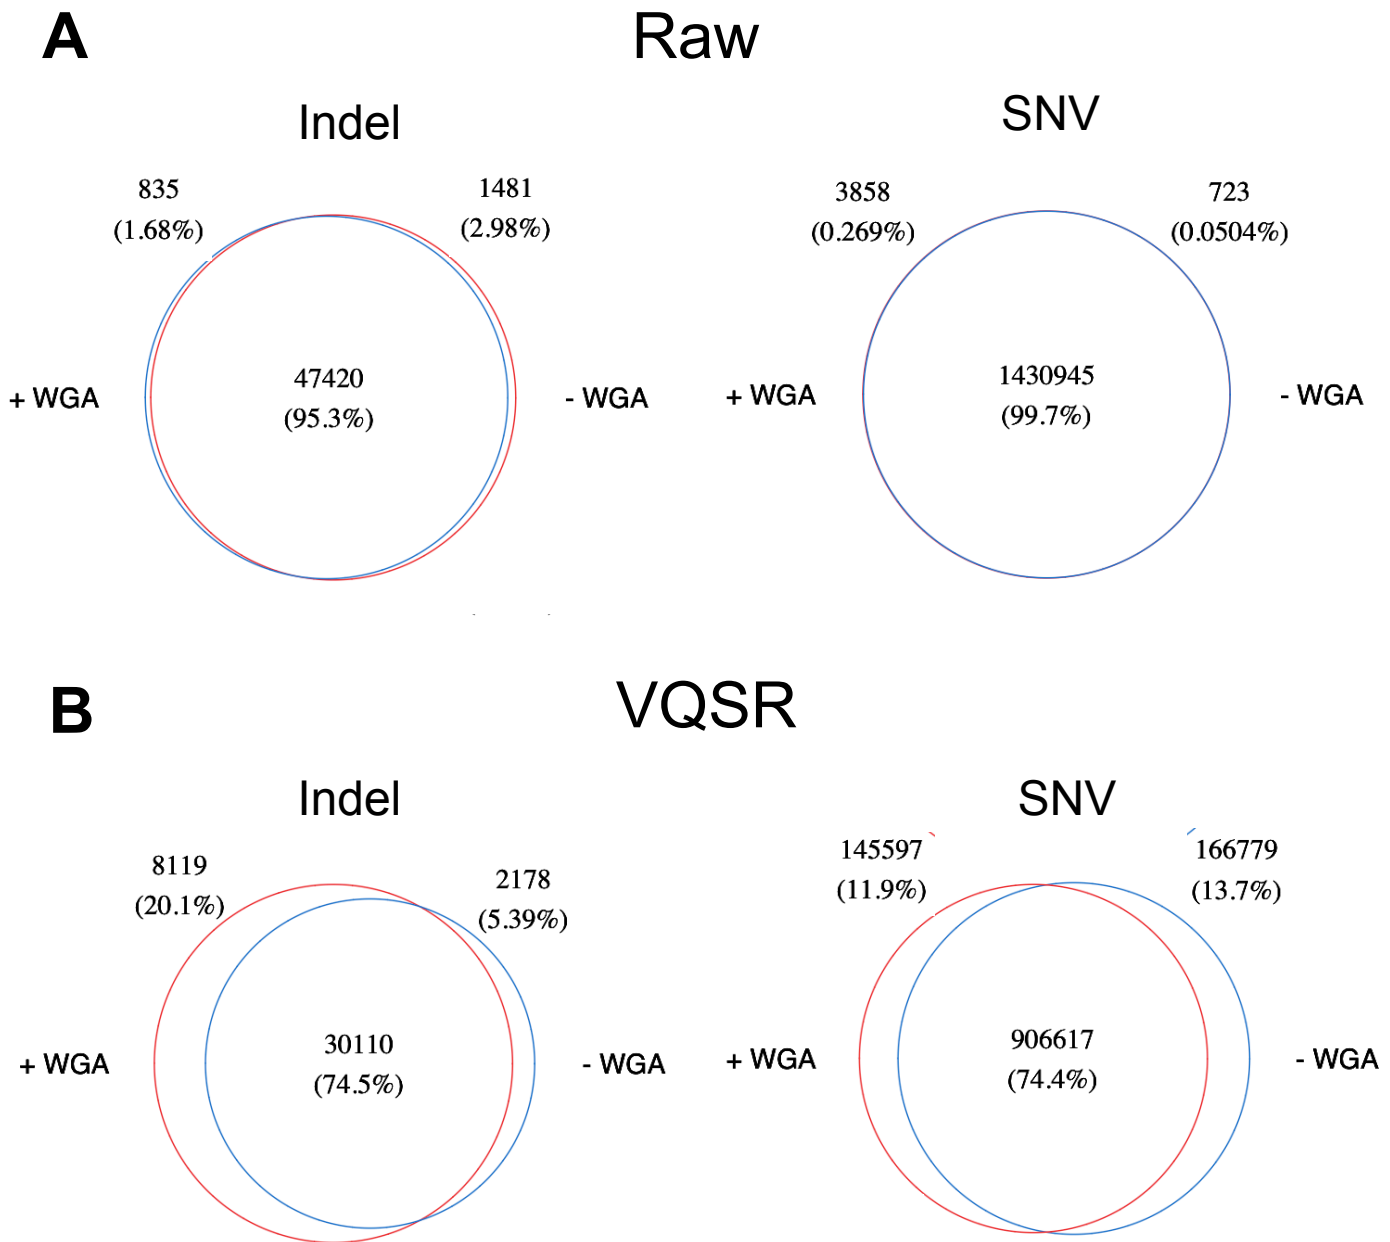

**S15 Fig. Overlap of variant calls after recalling variants excluding 614 WGA samples.**

(A) Overlap of group-called raw variants between 9004 WXS DNA samples group-called in the full pan-cancer cohort (WGA+) or group-called omitting WGA samples (WGA-). (B) Overlap of the same samples after VQSR filtering. VQSR settings: SNP TS 99.5%, Indel TS 90.0%

**S1 Table. Number of samples of each cancer type in the pan-cancer cohort**

|             |                                                                  |     |             |                                      |     |
|-------------|------------------------------------------------------------------|-----|-------------|--------------------------------------|-----|
| <b>ACC</b>  | Adrenocortical carcinoma                                         | 89  | <b>LUAD</b> | Lung adenocarcinoma                  | 575 |
| <b>BLCA</b> | Bladder Urothelial Carcinoma                                     | 416 | <b>LUSC</b> | Lung squamous cell carcinoma         | 327 |
| <b>BRCA</b> | Breast invasive carcinoma                                        | 849 | <b>OV</b>   | Ovarian serous cystadenocarcinoma    | 399 |
| <b>CESC</b> | Cervical squamous cell carcinoma and endocervical adenocarcinoma | 308 | <b>PAAD</b> | Pancreatic adenocarcinoma            | 188 |
| <b>CHOL</b> | Cholangiocarcinoma                                               | 49  | <b>PCPG</b> | Pheochromocytoma and Paraganglioma   | 182 |
| <b>COAD</b> | Colon adenocarcinoma                                             | 325 | <b>PRAD</b> | Prostate adenocarcinoma              | 510 |
| <b>ESCA</b> | Esophageal carcinoma                                             | 190 | <b>READ</b> | Rectum adenocarcinoma                | 114 |
| <b>GBM</b>  | Glioblastoma multiforme                                          | 315 | <b>SARC</b> | Sarcoma                              | 259 |
| <b>HNSC</b> | Head and Neck squamous cell carcinoma                            | 585 | <b>SKCM</b> | Skin Cutaneous Melanoma              | 472 |
| <b>KICH</b> | Kidney Chromophobe                                               | 66  | <b>STAD</b> | Stomach adenocarcinoma               | 485 |
| <b>KIRC</b> | Kidney renal clear cell carcinoma                                | 275 | <b>TGCT</b> | Testicular Germ Cell Tumors          | 149 |
| <b>KIRP</b> | Kidney renal papillary cell carcinoma                            | 319 | <b>THCA</b> | Thyroid carcinoma                    | 529 |
| <b>LAML</b> | Acute Myeloid Leukemia                                           | 123 | <b>UCEC</b> | Uterine Corpus Endometrial Carcinoma | 487 |
| <b>LGG</b>  | Brain Lower Grade Glioma                                         | 516 | <b>UCS</b>  | Uterine Carcinosarcoma               | 57  |
| <b>LIHC</b> | Liver hepatocellular carcinoma                                   | 380 | <b>UVM</b>  | Uveal Melanoma                       | 80  |



**S2 Table. Size and overlap with Gencode exons for the six capture kits used to collect TCGA normal DNA samples.**

| <b>Capture Kit</b> | <b>Size (MB)</b> | <b>Fraction Overlap With Gencode Exons</b> | <b>Number Samples</b> |
|--------------------|------------------|--------------------------------------------|-----------------------|
| Agilent Custom     | 33               | 0.993                                      | 5793                  |
| Nimblegen SQEZ v2  | 36               | 0.996                                      | 1337                  |
| Nimblegen hg18     | 36               | 0.992                                      | 577                   |
| Nimblegen HGSC     | 37               | 0.997                                      | 1350                  |
| Nimblegen SQEZ v3  | 39               | 0.999                                      | 210                   |
| SureSelect 38      | 64               | 0.982                                      | 171                   |
| Intersection       | 27               | 0.977                                      |                       |

S3 Table. Variance in LOF indel burden explained by technical covariates each indel filtering approach.

| <b>GATK Indel VQSR TS 90.0</b> |               |           |                |                  |
|--------------------------------|---------------|-----------|----------------|------------------|
|                                | <b>Sum Sq</b> | <b>Df</b> | <b>F value</b> | <b>Pr(&gt;F)</b> |
| <b>C20X</b>                    | 1.31E+04      | 1         | 323.8629669    | 4.52E-71         |
| <b>WGA</b>                     | 2.39E+00      | 1         | 0.05899371     | 8.08E-01         |
| <b>Center</b>                  | 1.49E+03      | 2         | 18.33944372    | 1.13E-08         |
| <b>BWA</b>                     | 1.19E+03      | 5         | 5.86624688     | 2.04E-05         |
| <b>Race</b>                    | 5.60E+04      | 5         | 276.5583032    | 1.43E-274        |
| <b>Residuals</b>               | 3.39E+05      | 8363      |                |                  |
| <b>GATK Indel VQSR TS 95.0</b> |               |           |                |                  |
|                                | <b>Sum Sq</b> | <b>Df</b> | <b>F value</b> | <b>Pr(&gt;F)</b> |
| <b>C20X</b>                    | 15219.389     | 1         | 327.944016     | 6.31E-72         |
| <b>WGA</b>                     | 1361.419      | 1         | 29.335557      | 6.26E-08         |
| <b>Center</b>                  | 3258.38       | 2         | 35.105429      | 6.57E-16         |
| <b>BWA</b>                     | 1507.617      | 5         | 6.497157       | 4.89E-06         |
| <b>Race</b>                    | 68648.485     | 5         | 295.844466     | 2.06E-292        |
| <b>Residuals</b>               | 388114.262    | 8363      |                |                  |
| <b>GATK Hardfilter</b>         |               |           |                |                  |
|                                | <b>Sum Sq</b> | <b>Df</b> | <b>F value</b> | <b>Pr(&gt;F)</b> |
| <b>C20X</b>                    | 50615.091     | 1         | 419.836036     | 4.45E-91         |
| <b>WGA</b>                     | 76075.977     | 1         | 631.025972     | 2.60E-134        |
| <b>Center</b>                  | 18981.98      | 2         | 78.724735      | 1.34E-34         |
| <b>BWA</b>                     | 4239.435      | 5         | 7.032952       | 1.44E-06         |
| <b>Race</b>                    | 150187.094    | 5         | 249.150811     | 6.51E-249        |
| <b>Residuals</b>               |               |           |                |                  |
| <b>GATK Indel VQSR TS 99.0</b> |               |           |                |                  |
|                                | <b>Sum Sq</b> | <b>Df</b> | <b>F value</b> | <b>Pr(&gt;F)</b> |
| <b>C20X</b>                    | 52930.43      | 1         | 153.90042      | 4.95E-35         |
| <b>WGA</b>                     | 3744887.28    | 1         | 10888.62716    | 0.00E+00         |
| <b>Center</b>                  | 383585.43     | 2         | 557.65614      | 4.53E-228        |
| <b>BWA</b>                     | 169507.9      | 5         | 98.57217       | 2.76E-101        |
| <b>Race</b>                    | 146904.86     | 5         | 85.42806       | 7.59E-88         |
| <b>Residuals</b>               | 2876257.21    | 8363      |                |                  |
| <b>Varscan</b>                 |               |           |                |                  |
|                                | <b>Sum Sq</b> | <b>Df</b> | <b>F value</b> | <b>Pr(&gt;F)</b> |
| <b>CX20</b>                    | 17843.14      | 1         | 167.73824      | 5.34E-38         |
| <b>WGA</b>                     | 4169.66       | 1         | 39.19778       | 4.02E-10         |
| <b>Center</b>                  | 5477.7        | 2         | 25.74714       | 7.12E-12         |
| <b>BWA</b>                     | 178965.82     | 5         | 336.48128      | 0.00E+00         |
| <b>Race</b>                    | 72980.97      | 5         | 137.21464      | 2.80E-140        |
| <b>Residuals</b>               | 889613.31     | 8363      |                |                  |
